# Supplementary material for: Two amino acid-templated metal phosphates: surfactant-thermal synthesis, water stability, and proton conduction
Source: Royal Society of Chemistry journal article supplement (doi:10.1039/d0dt00966k), 2020-01-01
Supplement: d0dt00966k1.pdf [file d0dt00966k1.pdf]

**Two amino acid-templated metal phosphates: surfactant-thermal  
synthesis, water stability, and proton conduction**

Lijuan Huang,<sup>a,b</sup> Lei Wang,<sup>a,b</sup> Yan Zhao,<sup>a</sup> Ling Huang,<sup>a</sup> Jian Bi,<sup>a</sup> Guohong Zou,<sup>b</sup>

Zhien Lin<sup>\*b</sup> and Daojiang Gao<sup>\*a</sup>

<sup>a</sup> *College of Chemistry and Materials Science, Sichuan Normal University, Chengdu  
610068, P. R. China.*

<sup>b</sup> *College of Chemistry, Sichuan University, Chengdu 610064, P. R. China.*

\* To whom correspondence should be addressed. Tel: +86-28-85412284. E-mail:  
zhienlin@scu.edu.cn (Z. Lin); daojianggao@sicnu.edu.cn (D. Gao)

### Physical measurements:

Powder X-ray diffraction (XRD) data were obtained using a Rigaku D/MAX-rA diffractometer with Cu-K $\alpha$  radiation ( $\lambda = 1.5418 \text{ \AA}$ ). The elemental analysis was carried out on an Elementar Vario EL III analyzer. IR spectra (KBr pellets) were recorded on a Nicolet Impact 410 FTIR spectrometer. The thermogravimetric analyses were performed on a Netzsch STA 449c analyzer in a flow of N<sub>2</sub> with a heating rate of 10 °C/min. The fluorescent spectrum was collected on a Fluorolog-3 fluorescence spectrometer (Horiba JobinYvon) equipped with a 450 W xenon lamp. Alternating current impedance measurements were carried out with a Solartron SI 1260 impedance/gain-phase analyzer over the frequency range from 0.1 Hz to 10 MHz with an applied voltage of 10 mV. The relative humidity was controlled by a STIK Corp. CIHI-150B incubator. The sample was pressed to form a cylindrical pellet of crystalline powder sample (~2 mm thickness  $\times$  5 mm  $\phi$ ) coated with C-pressed electrodes. Two silver electrodes were attached to both sides of pellet to form four end terminals (quasi-four-probe method). Single crystal X-ray diffraction data were collected on a New Gemini, Dual, Cu at zero, EosS2 diffractometer at room temperature. The crystal structures were solved by direct methods. The structures were refined on  $F^2$  by full-matrix least-squares methods using the *SHELXTL* program package.<sup>1</sup>

### Reference

1. G. M. Sheldrick, Acta Cryst., Sect. A, 2008, 64, 112.

### Synthesis

**Synthesis of Zn(HPO<sub>4</sub>)(C<sub>6</sub>H<sub>11</sub>NO<sub>2</sub>) (1):** Compound **1** was prepared by heating a mixture of ZnO (0.082 g), L-homoproline (0.261 g), H<sub>3</sub>PO<sub>4</sub> (85%, 0.135 mL), and PEG-200 (2.0 mL) in a Teflon-coated steel autoclave at 150 °C for 7 days. The autoclave was subsequently allowed to cool to room temperature. Colourless crystals of compound **1** were separated from the resulting product by filtration, washed with ethanol, and dried in air (31% yield based on zinc). This compound can't be prepared

without L-homoproline in the reactions. Instead, a hydrated zinc phosphate  $\text{Zn}_3(\text{PO}_4)_2 \cdot 4\text{H}_2\text{O}$  (hopeite, JCPDS: 37-465) was often obtained as the resulting product.

**Synthesis of  $(\text{C}_5\text{H}_{10}\text{NO}_2)\text{Ga}_4(\text{PO}_4)_4\text{F} \cdot 3\text{H}_2\text{O}$  (2):** Compound **2** was prepared by heating a mixture of  $\text{Ga}_2\text{O}_3$  (0.187 g), L-proline (0.115 g),  $\text{H}_3\text{PO}_4$  (85%, 0.135 mL), HF (40%, 88  $\mu\text{L}$ ), and PEG-200 (2.0 mL) in a Teflon-coated steel autoclave at 160  $^\circ\text{C}$  for 7 days. The autoclave was subsequently allowed to cool to room temperature. Light-yellow crystals of compound **2** were separated from the resulting product by filtration, washed with ethanol, and dried in air (46% yield based on gallium). This compound can't be prepared without L-proline in the reactions. Instead, a dense gallium phosphate  $\text{GaPO}_4$  with a quartz-type structure was often obtained as the resulting product.

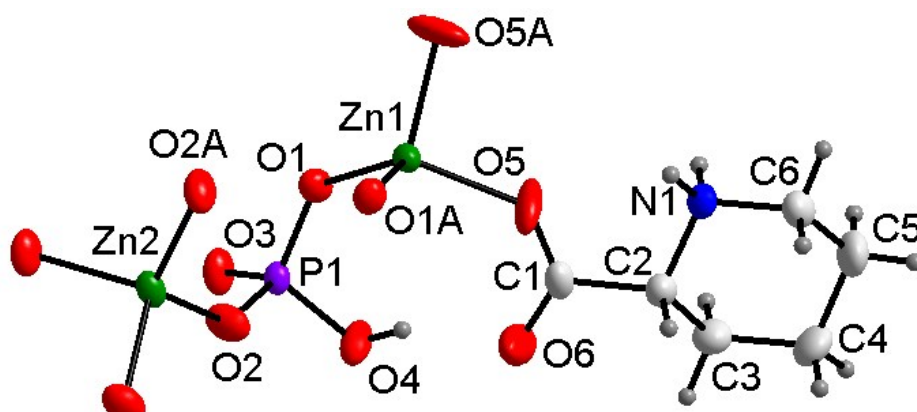

**Fig. S1.** View of the tetrahedral coordination environments for Zn and P in the asymmetric unit of compound **1**, showing the atom-labeling scheme and 50% thermal ellipsoids. Atom labels having “A” and “B” refer to symmetry-generated atoms.

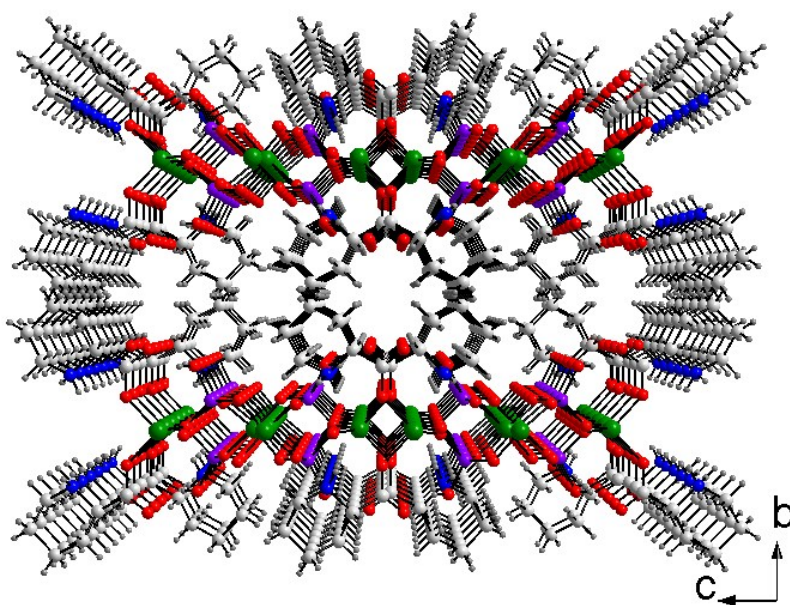

**Fig. S2.** Pack structure of compound **1** along the  $[100]$  direction.

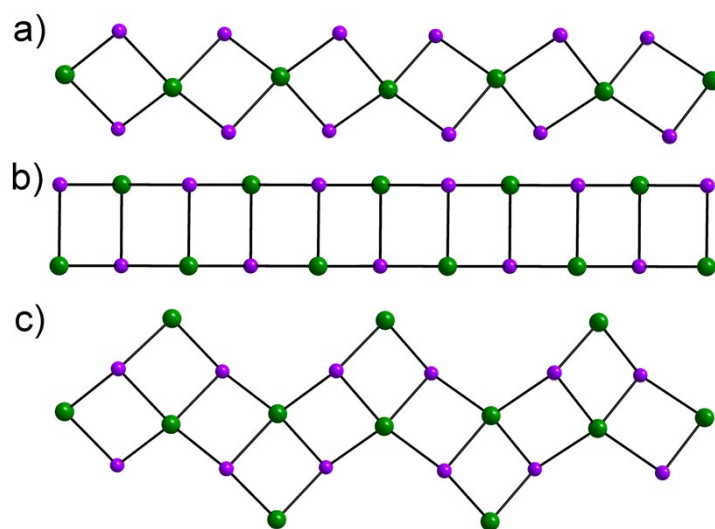

**Fig. S3.** Schematic representation of three chain-like structures found in metal phosphates: (a) corner-sharing 4-MR chain; (b) edge-sharing 4-MR chain; (c) zigzag edge-sharing 4-MR chain. Oxygen atoms are omitted for clarity.

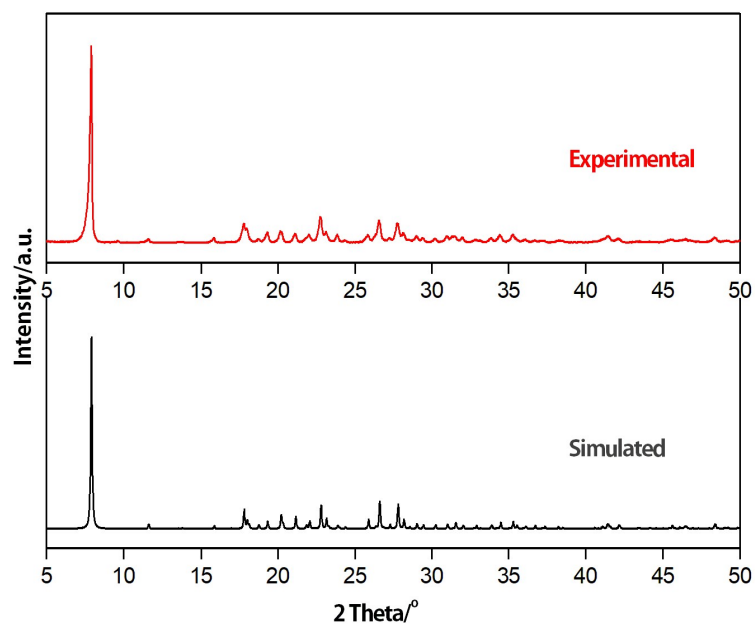

**Fig. S4.** Experimental and simulated powder XRD patterns of compound **1**.

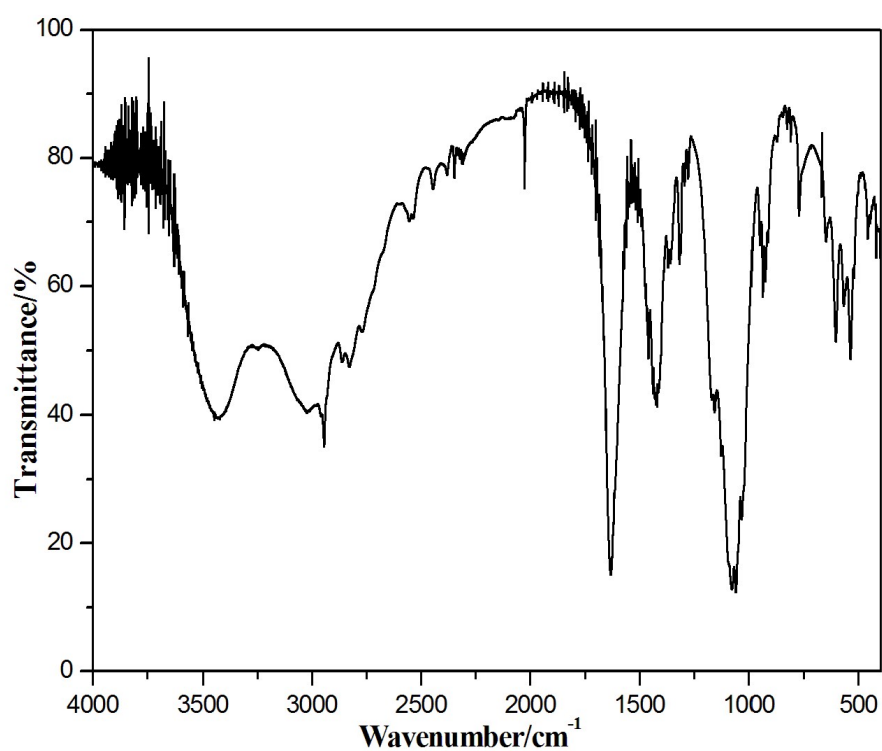

**Fig. S5.** IR spectrum of compound **1**.

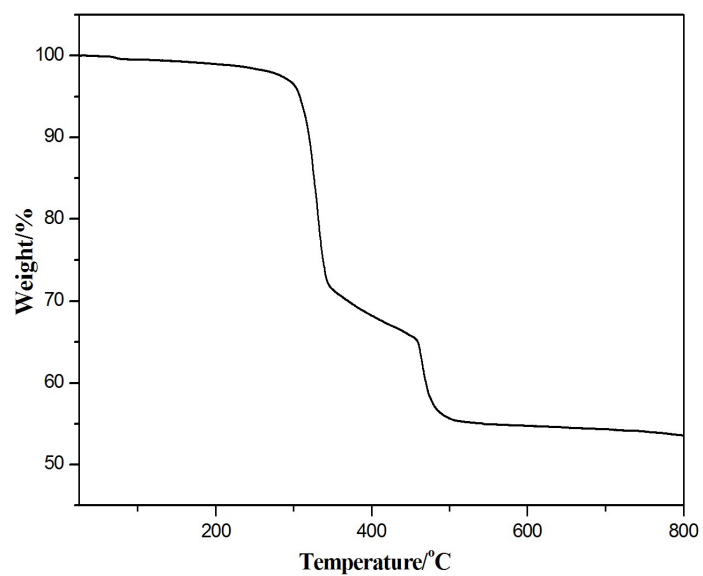

**Fig. S6.** TGA curve of compound **1**.

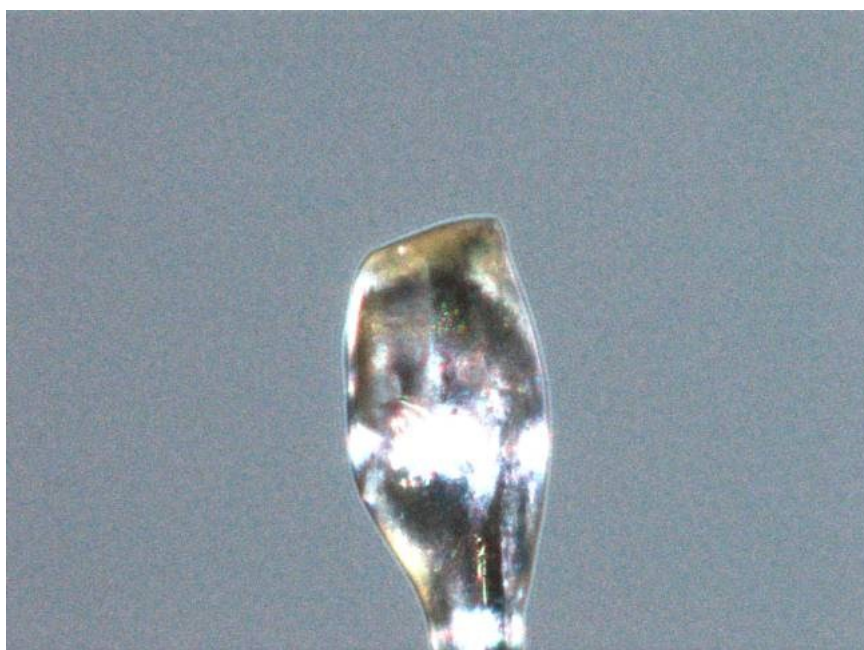

**Fig. S7.** Crystal photo of compound **1** on a thin glass fiber.

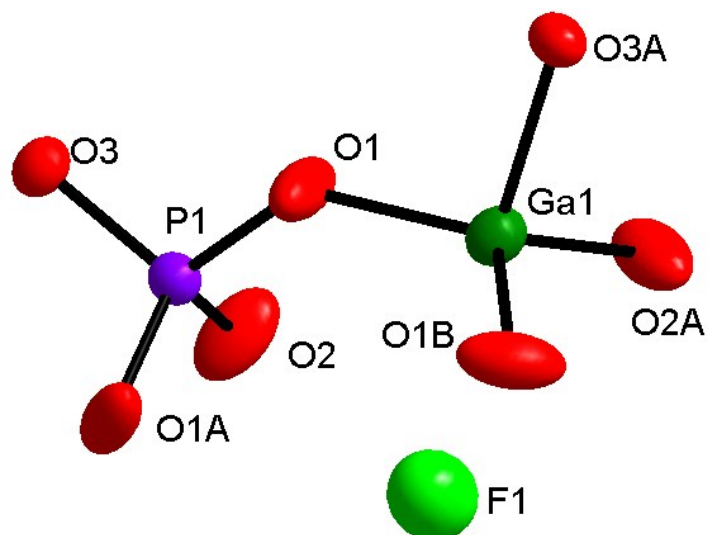

**Fig. S8.** View of the tetrahedral coordination environments for Ga and P in the asymmetric unit of compound **2**, showing the atom-labeling scheme and 50% thermal ellipsoids. Atom labels having “A” and “B” refer to symmetry-generated atoms.

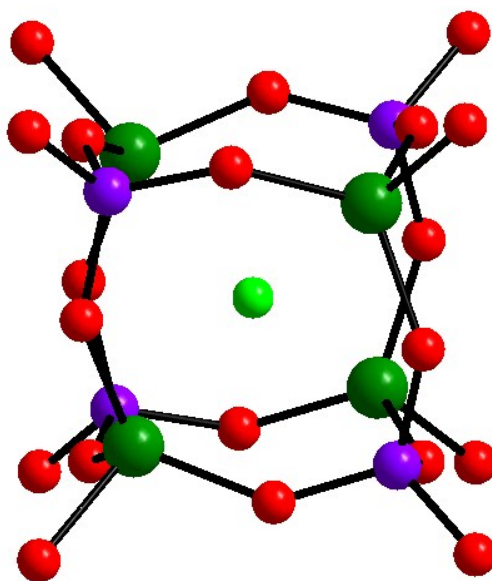

**Fig. S9.** View of the d4r cage encapsulating  $F^-$  ions within its center.

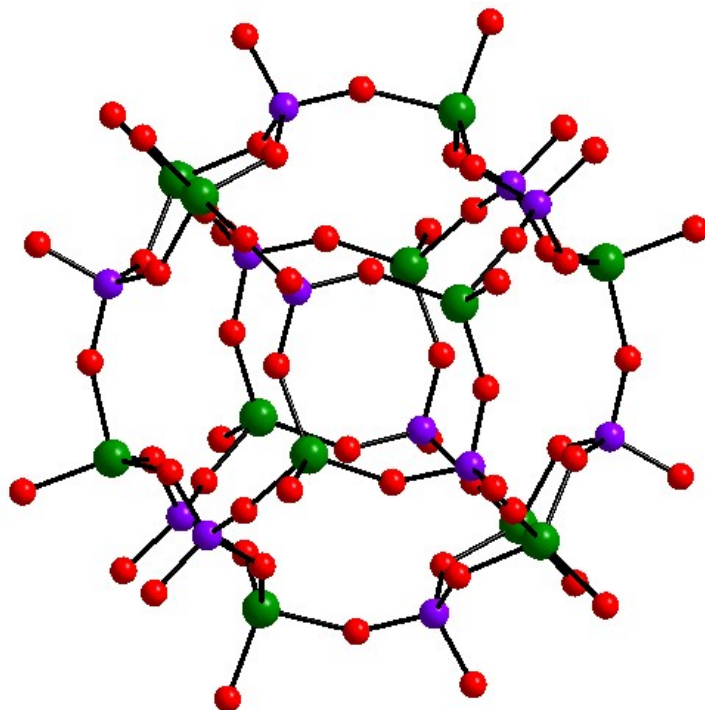

**Fig. S10.** View of the  $\beta$  cage in compound 2.

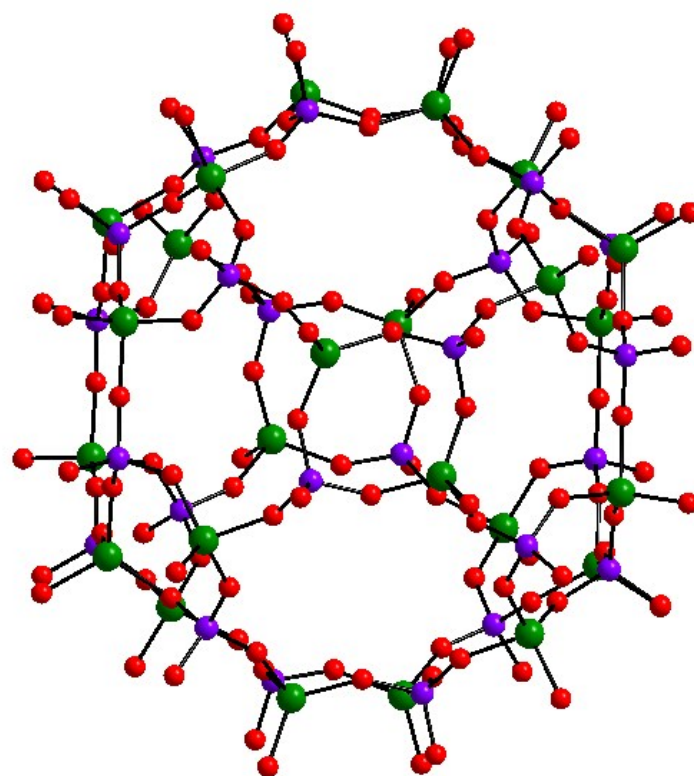

**Fig. S11.** View of the  $\alpha$  cage in compound 2.

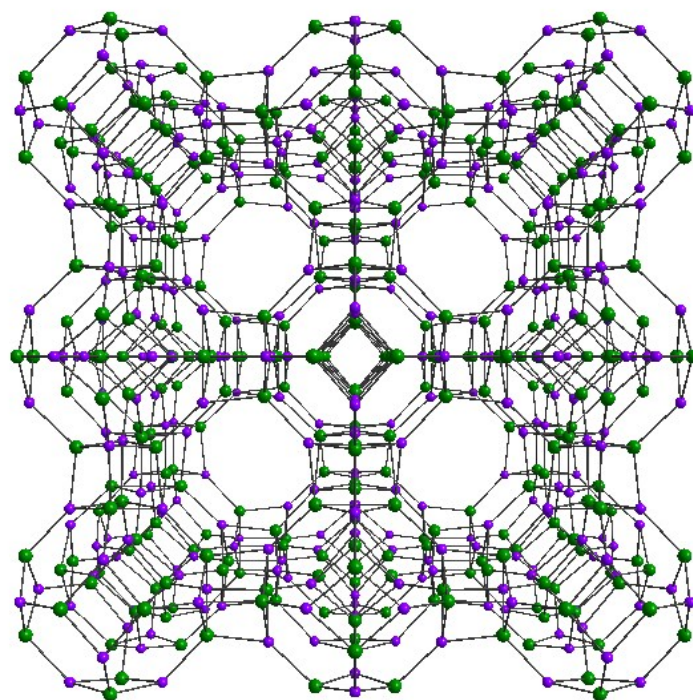

**Fig. S12.** The zeolitic LTA topology of compound 2.

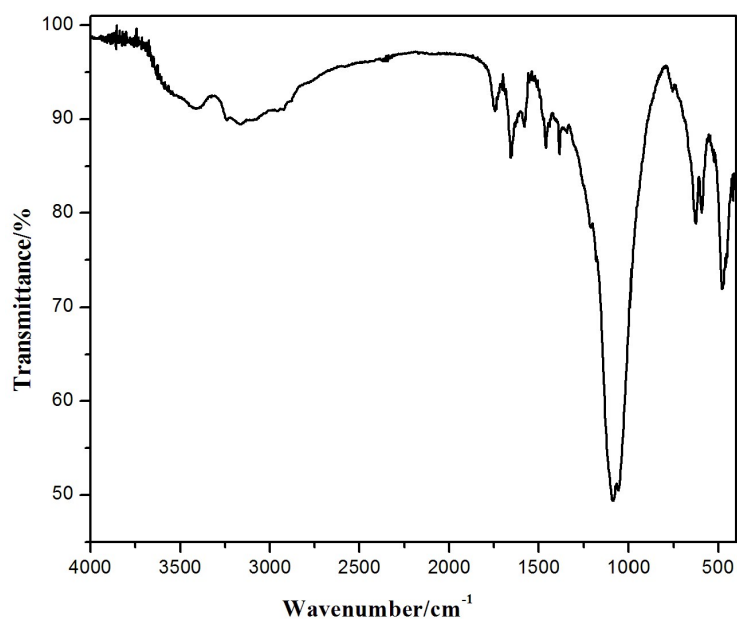

**Fig. S13.** IR spectrum of compound 2.

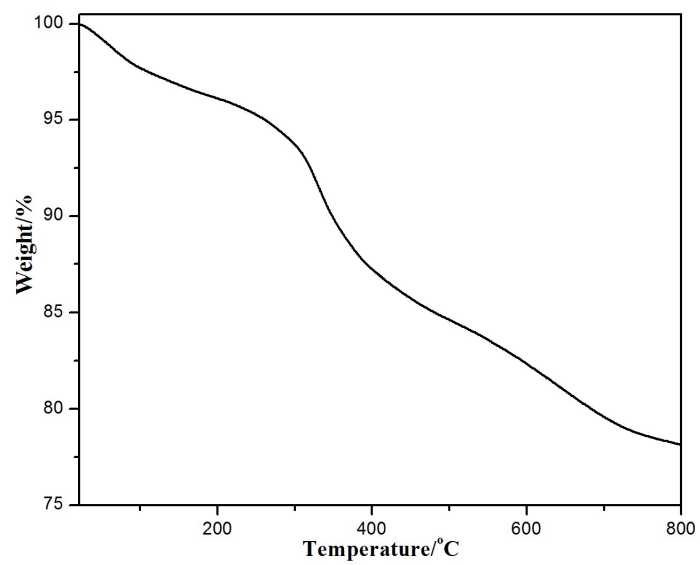

**Fig. S14.** TGA curve of compound **2**.

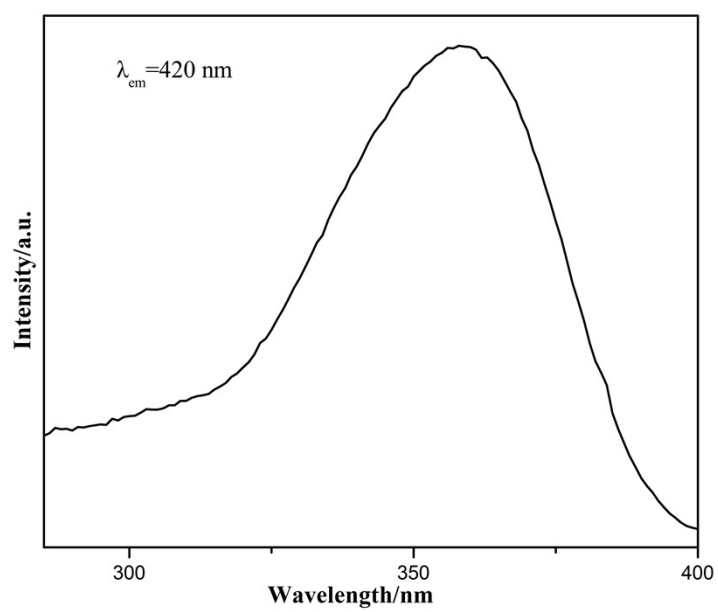

**Fig. S15.** The excitation spectrum of compound **2**.

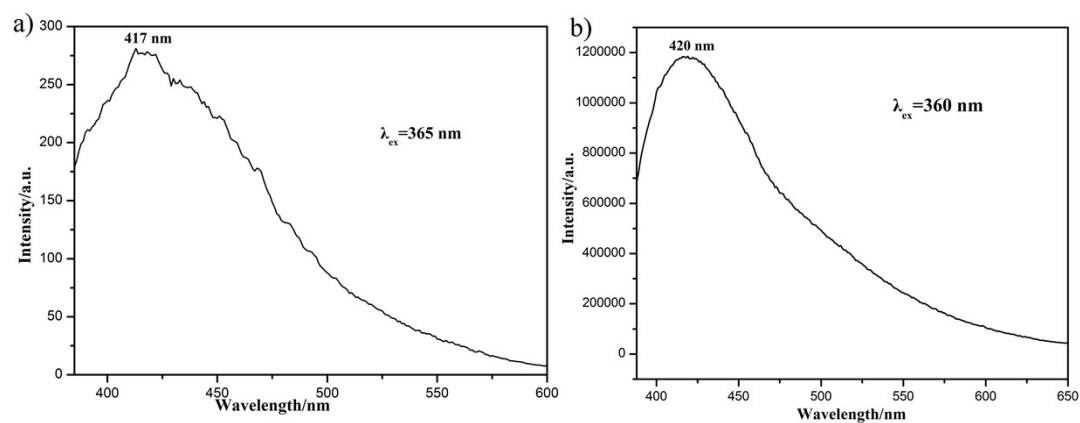

**Fig. S16.** Room-temperature emission spectra of (a) L-proline molecules and (b) compound 2.

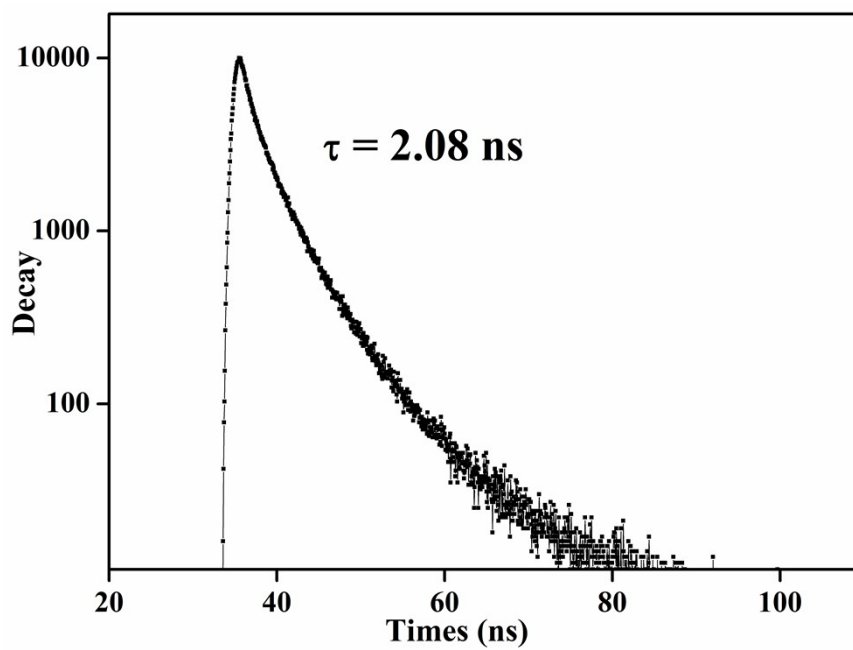

**Fig. S17.** The lifetime of compound 2.

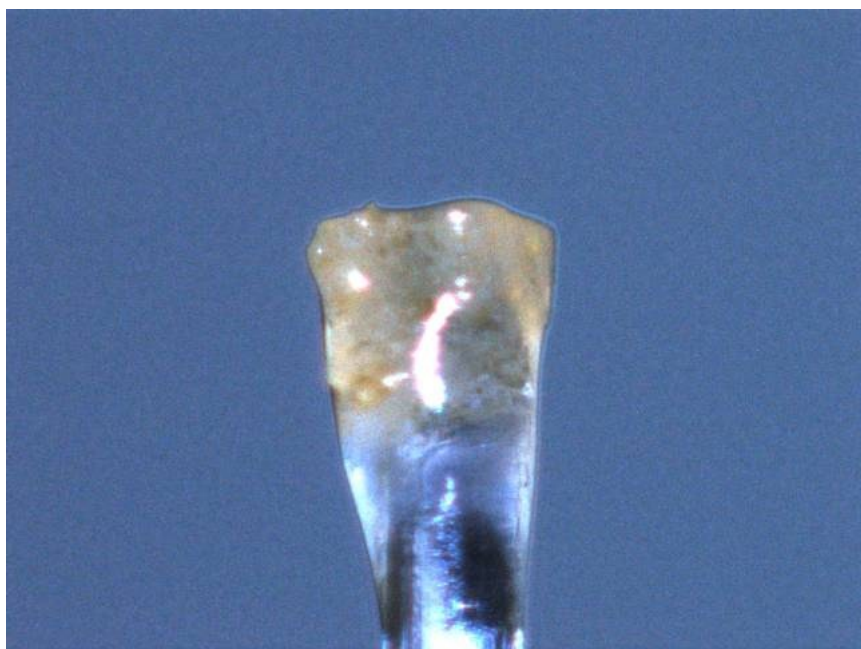

**Fig. S18.** Crystal photo of compound **2** on a thin glass fiber.

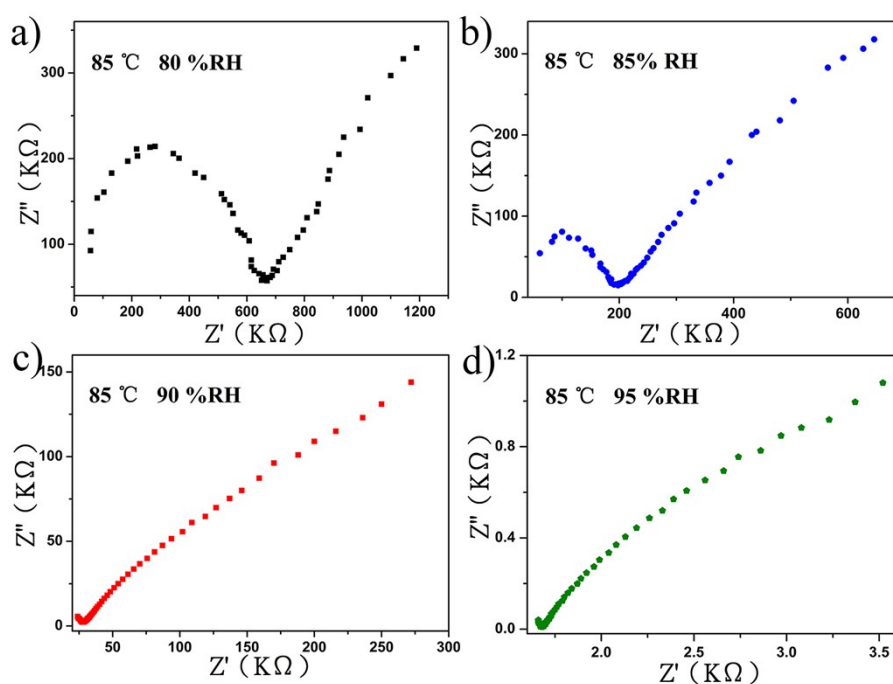

**Fig. S19.** Nyquist plots of compound **2** at 85 °C under different humidity conditions. The conductivity is  $2.29 \times 10^{-6} \text{ S}\cdot\text{cm}^{-1}$  (80% RH),  $7.54 \times 10^{-6} \text{ S}\cdot\text{cm}^{-1}$  (85% RH),  $4.43 \times 10^{-5} \text{ S}\cdot\text{cm}^{-1}$  (90% RH), and  $8.89 \times 10^{-4} \text{ S}\cdot\text{cm}^{-1}$  (95% RH).
